# Supplementary material for: In situ assembly of monodisperse, multifunctional silica microspheres embedded with magnetic and fluorescent nanoparticles and their application in adsorption of methylene blue
Source: Royal Society of Chemistry journal article supplement (doi:10.1039/c3cp53179a), 2013-01-01
Supplement: c3cp53179a.pdf [file c3cp53179a.pdf]

## Supplementary Information

### **In situ Assembly of Monodisperse, Multifunctional Silica Microspheres Embedded with Magnetic and Fluorescent Nanoparticles and Application for Adsorption of methylene blue**

Jianhui Shi<sup>a</sup>, Xiaozhen Ren, Lizhu Tong, Xiaodong Chen, Xuwei Yang and Hua Yang\*

College of Chemistry, Jilin University, Changchun, 130012, China

\*Corresponding author:

E-mail address: huayang86@sina.com

<sup>a</sup>She is working in College of Environmental Science and Engineering, Taiyuan University of Technology, Taiyuan, 030024, China

#### **EXPERIMENTAL SECTION**

##### **Absorption experiments.**

Typically, 20 mg of  $\text{Fe}_3\text{O}_4/\text{YVO}_4:\text{Eu}^{3+}\text{-SiO}_2$  was added to 40 mL of methylene blue solution with a concentration of 8 mg/L at room temperature. We will take out 1ml above solution every once a while. After magnetic separation, it was measured by UV/Vis absorption spectra and the absorption curve was obtained.

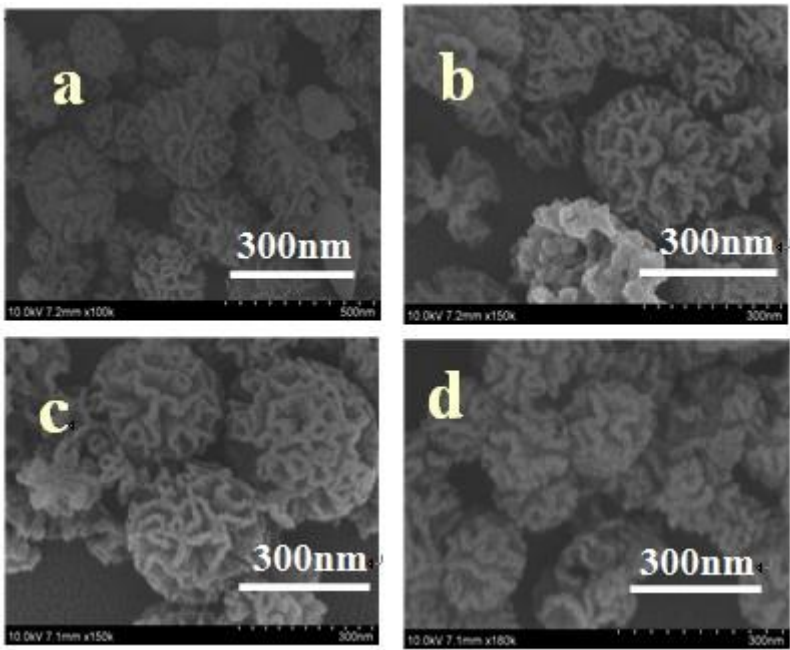

Fig. S1:SEM of Fe<sub>3</sub>O<sub>4</sub>/YVO<sub>4</sub>:Eu<sup>3+</sup>-SiO<sub>2</sub> with different mass of CTAB: 0g (a), 0.5g (b), 0.95g (c), 1.5g (d)

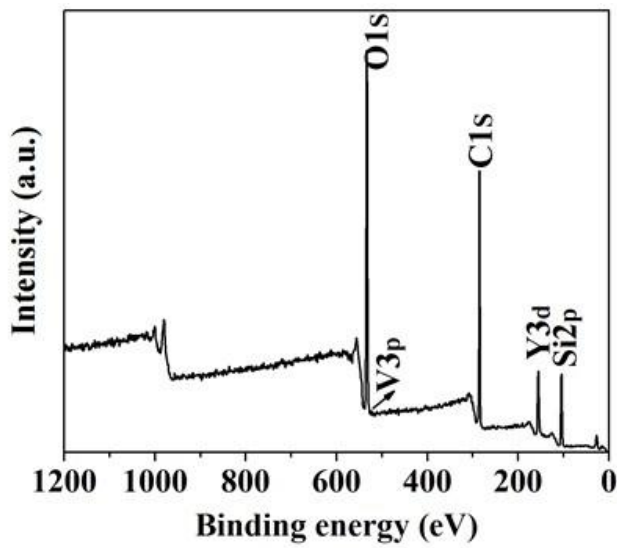

Fig. S2. XPS pattern of Fe<sub>3</sub>O<sub>4</sub>/YVO<sub>4</sub>:Eu<sup>3+</sup>-SiO<sub>2</sub> composites

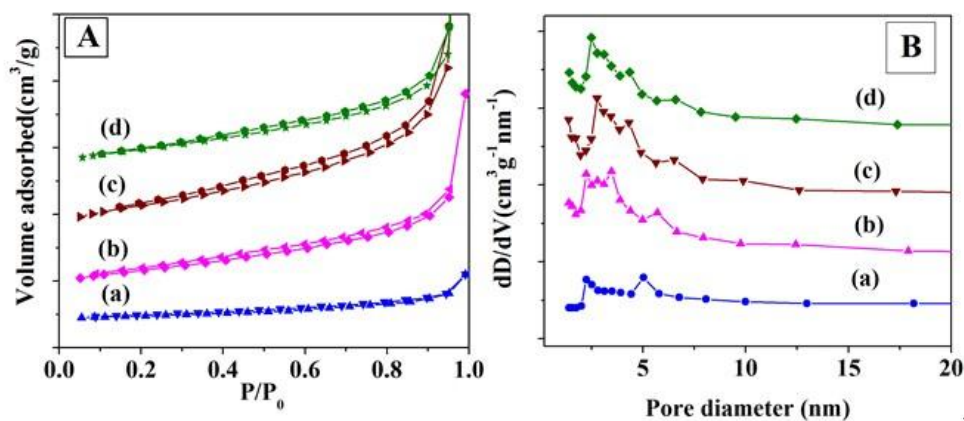

Fig. S3. (A) Nitrogen-sorption isotherms and (B) BJH pore-size distributions of  $\text{Fe}_3\text{O}_4/\text{YVO}_4:\text{Eu}^{3+}\text{-SiO}_2$  prepared by using different mass of CTAB as templates: (a) 0g, (b) 0.5g, (c) 0.95g and (d) 1.5g, respectively.

Table 1S: Physical and surface properties of samples

| Sample | specific surface area<br>(m <sup>2</sup> /g) | Pore Diameter<br>(nm) | Total Pore Volume<br>(cm <sup>3</sup> /g) |
|--------|----------------------------------------------|-----------------------|-------------------------------------------|
| a      | 55.8                                         | 5.02                  | 0.217                                     |
| b      | 302.6                                        | 3.47                  | 0.956                                     |
| c      | 457.7                                        | 2.76                  | 2.364                                     |
| d      | 347.3                                        | 2.48                  | 1.706                                     |

Enclosure: Pure mesoporous  $\text{SiO}_2$ : specific surface area (406.1 m<sup>2</sup>/g) , Pore Diameter (2.78 nm) , Total Pore Volume (1.664 cm<sup>3</sup>/g)

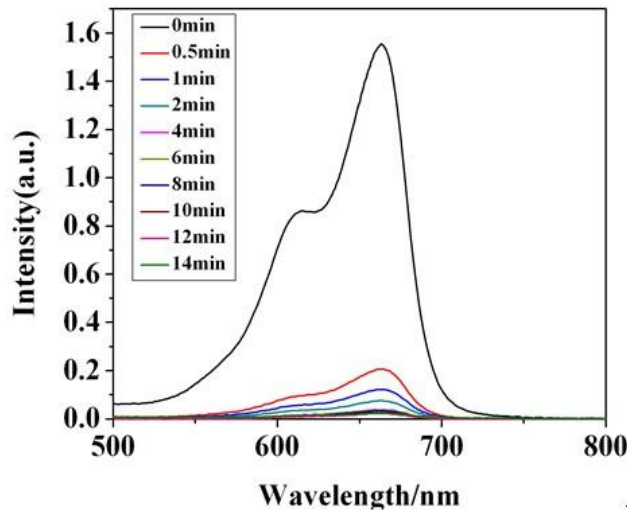

Fig. S4. UV/Vis absorption spectra of the methylene blue after adsorption by  $\text{Fe}_3\text{O}_4/\text{YVO}_4:\text{Eu}^{3+}\text{-SiO}_2$  with different time

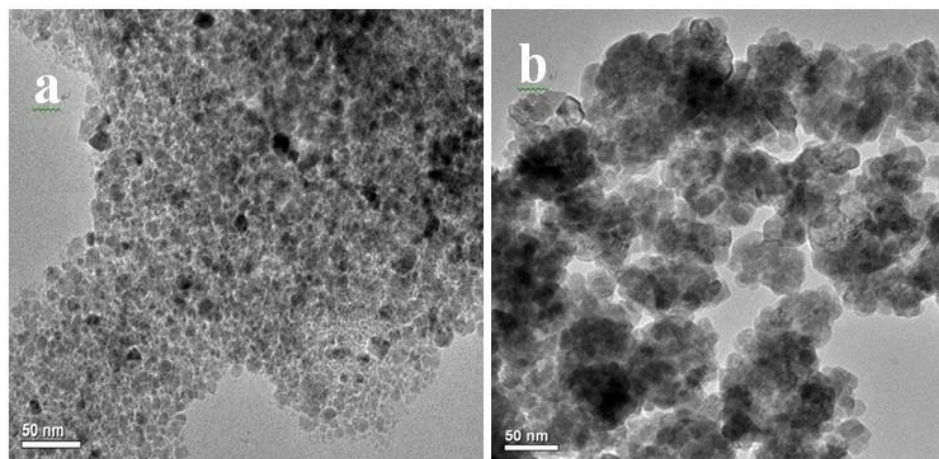

Fig. S5. TEM of  $\text{Fe}_3\text{O}_4$ -oleate (a) and  $\text{YVO}_4:\text{Eu}^{3+}$ -oleate (b)
